# Supplementary material
Source: publisher site journal article supplement (https://www.spandidos-publications.com/8425/downloadSupplementary)
Supplement: Supplementary file 1 [file downloadSupplementary]

Table SI. Short hairpin RNA lentiviral information.

| Sequencing of IDH2 small interfering RNA design |            |                        |           |                       |        |
|-------------------------------------------------|------------|------------------------|-----------|-----------------------|--------|
| NO.                                             | Accession  | Target Seq             | CDS       | GC%                   |        |
| Idh2-RNAi (122232-2)                            | NM_173011  | GAAGAGTTCAAGCTGAAGAAA  | 75..1433  | 36.84%                |        |
| Idh2-RNAi (122233-2)                            | NM_173011  | GCTCTACTTGAGCACCAAGAA  | 75..1433  | 42.11%                |        |
| Idh2-RNAi (122234-1)                            | NM_173011  | CGTGGATGTTCAAGCTCAAGTA | 75..1433  | 42.11%                |        |
| Synthetic oligo information                     |            |                        |           |                       |        |
| NO.                                             | 5'         | STEM                   | Loop      | STEM                  | 3'     |
| Idh2-RNAi (122232-2)-a                          | Ccgg       | GAAGAGTTCAAGCTGAAGAAA  | CTCGAG    | TTTCTTCAGCTTGAAGCTCTC | TTTTTg |
| Idh2-RNAi (122232-2)-b                          | aattcaaaaa | GAAGAGTTCAAGCTGAAGAAA  | CTCGAG    | TTTCTTCAGCTTGAAGCTCTC |        |
| Idh2-RNAi (122233-2)-a                          | Ccgg       | GCTCTACTTGAGCACCAAGAA  | CTCGAG    | TTCTTGGTGCTCAAGTAGAGC | TTTTTg |
| Idh2-RNAi (122233-2)-b                          | aattcaaaaa | GCTCTACTTGAGCACCAAGAA  | CTCGAG    | TTCTTGGTGCTCAAGTAGAGC |        |
| Idh2-RNAi (122234-1)-a                          | Ccgg       | CGTGGATGTTCAAGCTCAAGTA | CTCGAG    | TACTTGAGCTGAACATCCACG | TTTTTg |
| Idh2-RNAi (122234-1)-b                          | aattcaaaaa | CGTGGATGTTCAAGCTCAAGTA | CTCGAG    | TACTTGAGCTGAACATCCACG |        |
| GV112-NC-1                                      | CCGG       | TTCTCCGAACGTGTCACGT    | TTCAAGAGA | ACGTGACACGTTCCGGAGAA  | TTTTTg |
| GV112-NC-2                                      | AATTCAAAAA | TTCTCCGAACGTGTCACGT    | TCTCTTGAA | ACGTGACACGTTCCGGAGAA  |        |

RNAi, RNA interference.

Table SII. IDH 2 plasmid information.

|                    |                                          |
|--------------------|------------------------------------------|
| gen ID             | 269951                                   |
| Gene name          | IDH2                                     |
| Genes full name    | IDH2 (NADP <sup>+</sup> ), mitochondrial |
| alias              | IDPm; Idh-2; E430004F23                  |
| Transcript no      | NM_173011                                |
| CDS length         | 1359 bp                                  |
| Sequencing primers | Forward CAG: 5'-CTCTGCTAACCATGTTTCATG-3' |
|                    | Reverse BGH: 5'-CCAGGGTCAAGGAAGGCAC-3'   |

IDH2, isocitrate dehydrogenase 2.

Table SIII. Information about binding of the modified protein to the substrate.

| Original docking score |                     |                         |
|------------------------|---------------------|-------------------------|
| Mode                   | Affinity (kcal/mol) | Distance from best mode |
| 1                      | -5.0                | 0.000                   |
| 2                      | -5.0                | 20.188                  |
| 3                      | -5.0                | 13.238                  |
| 4                      | -4.9                | 16.982                  |
| 5                      | -4.8                | 23.946                  |
| 6                      | -4.7                | 12.986                  |
| 7                      | -4.7                | 9.000                   |
| 8                      | -4.7                | 13.687                  |
| 9                      | -4.7                | 13.209                  |
| Average                | -4.83               | -                       |
| Modified_docking_score |                     |                         |
| 1                      | -5.0                | 0.000                   |
| 2                      | -4.9                | 1.344                   |
| 3                      | -4.8                | 1.322                   |
| 4                      | -4.8                | 8.541                   |
| 5                      | -4.6                | 6.279                   |
| 6                      | -4.5                | 2.840                   |
| 7                      | -4.5                | 12.551                  |
| 8                      | -4.4                | 8.174                   |
| 9                      | -4.3                | 7.990                   |
| Average                | -4.64               | -                       |

Structure acquisition: the pdb structure file of P54071\_Idh 2 protein was downloaded from the Uniprot database; the sdf structure file of Isocitric acid was downloaded from the PubChem database. Protein site mutation / modification: add lactified chemical group to the amino acid residue 275 of Idh 2 protein.

Table SIV. Docking results of target protein.

| Protein 1 | Protein 2 | Binding energy (kcal/mol) | Contact sites (protein 1)                                                       | Contact sites (protein 2)                                             | Combination type                                    |
|-----------|-----------|---------------------------|---------------------------------------------------------------------------------|-----------------------------------------------------------------------|-----------------------------------------------------|
| IDH2      | P300      | -190.18                   | LYS-275, LYS-48, LYS-280, THR-276, ASP-279, GLY-339, HIS-273, LYS-340           | GLU-1499, LYS-1425, ARG-1477, CYS-1602, HIS-1480, ASP-1492            | Salt bridge, hydrogen bond, hydrophobic interaction |
|           | Sirt1     | -200.85                   | LYS-275, ASP-279, LYS-282, ILE-283, TRP-284, TYR-247, SER-301, SER-300          | LYS-320, ASN-479, HIS-483                                             | Salt bridge, hydrogen bond, hydrophobic interaction |
|           | Sirt2     | -195.69                   | LYS-275, GLY-163, THR-165, SER-301, ARG-288, GLU-286                            | LYS-275, ASN-238, GLY-236                                             | Hydrogen bond, hydrophobic interaction              |
|           | Sirt3     | -289.40                   | LYS-275, ASP-292, ASP-271, LYS-275, ASP-279, ILE-283, LYS-299                   | HIS-138, ARG-334, GLN-323, ARG-326, GLU-133, GLU-306                  | Salt bridge, hydrogen bond, hydrophobic interaction |
|           | Sirt4     | -216.39                   | LYS-275, ASP-292, ASP-279, LYS-282, LYS-275, LYS-263, HIS-287, ARG-288, LYS-256 | GLN-112, TRP-123, PRO-120, LYS-148, PRO-111, SER-115, SER-66, TRP-189 | Salt bridge, hydrogen bond, hydrophobic interaction |
|           | Sirt6     | -251.55                   | LYS-275, GLY-163, THR-165, LYS-282, TYR-247, ASP-271, GLN-267, GLU-286          | ARG-232, ASP-251, ARG-231, ARG-248, HIS-246, ARG-220                  | Salt bridge, hydrogen bond, hydrophobic interaction |

IDH2 (ID: 4J8A), Sirt2 (ID: Q8VDQ8), Sirt3 (ID: Q8R104), Sirt4 (ID: Q8R216), Sirt 6 (ID: P59941) target proteins were obtained from the RCSB and UniProt databases (<https://www.rcsb.org/>, <https://www.uniprot.org/>), Sirt1, The P300 performs homology modeling using the Swiss-Model online server according to its amino acid sequence (<https://swissmodel.expasy.org/>, Homologous template:8han, 5btr). The HDock server predicts binding complexes between two molecules, such as protein and nucleic acid, by using a hybrid docking strategy. Using HDock software, each protein was set to rigid, the docking contact site was set to full surface, the resulting conformation was set to 100, and docking scores were calculated based on knowledge iterative scoring function ITScorePP. A more negative docking score implies a more likely binding model. This time, the conformation with the most negative energy was selected by using the scoring function and optimized by using the Minimization module in the MOE 2019.1 software platform to solve the possible contact with unreasonable spatial structure of rigid docking. The force field of energy minimization is Amber10: ETH, and the solvation model selects water molecules. The optimization method is divided into two steps: steepest descent (Steepest Descent) and conjugate gradient (Conjugate Gradient), and the maximum number of iterations is 5000. The optimization results were most followed by using Pymol2.1 software. IDH2, isocitrate dehydrogenase 2.
